# Blood $\alpha$ -Tocopherol, $\gamma$ -Tocopherol Levels and Risk of Prostate Cancer: A Meta-Analysis of Prospective Studies

Ran Cui<sup>1</sup>, Zhu-Qing Liu<sup>1</sup>, Qing Xu<sup>\*</sup>

Department of Medical Oncology, Shanghai Tenth People's Hospital, Tongji University, School of Medicine, Shanghai, China

## Abstract

**Background:** Epidemiological studies that have examined the association of blood  $\alpha$ -tocopherol and  $\gamma$ -tocopherol (the principal bioactive form of vitamin E) levels with the risk of prostate cancer have yielded inconsistent results. In addition, a quantitative assessment of published studies is not available.

**Methods and Findings:** In this meta-analysis, relevant studies were sought by a search of the PubMed and Embase databases for articles published up to October 2013, with no restrictions. Bibliographies from retrieved articles also were scoured to find further eligible studies. Prospective studies that reported adjusted relative risk (RR) estimates with 95% confidence intervals (CIs) for the association between blood tocopherol levels and the risk of prostate cancer were included. Nine nested case-control studies involving approximately 370,000 participants from several countries were eligible. The pooled RRs of prostate cancer for the highest versus lowest category of blood  $\alpha$ -tocopherol levels were 0.79 (95% CI: 0.68–0.91), and those for  $\gamma$ -tocopherol levels were 0.89 (95% CI: 0.71–1.12), respectively. Significant heterogeneity was present among the studies in terms of blood  $\gamma$ -tocopherol levels ( $p = 0.008$ ) but not in terms of blood  $\alpha$ -tocopherol levels ( $p = 0.33$ ). The risk of prostate cancer decreased by 21% for every 25-mg/L increase in blood  $\alpha$ -tocopherol levels (RR: 0.79; 95% CI: 0.69–0.91).

**Conclusions:** Blood  $\alpha$ -tocopherol levels, but not  $\gamma$ -tocopherol levels, were inversely associated with the risk of prostate cancer in this meta-analysis.

**Citation:** Cui R, Liu Z-Q, Xu Q (2014) Blood  $\alpha$ -Tocopherol,  $\gamma$ -Tocopherol Levels and Risk of Prostate Cancer: A Meta-Analysis of Prospective Studies. PLoS ONE 9(3): e93044. doi:10.1371/journal.pone.0093044

**Editor:** Zoran Culig, Innsbruck Medical University, Austria

**Received:** December 18, 2013; **Accepted:** February 28, 2014; **Published:** March 25, 2014

**Copyright:** © 2014 Cui et al. This is an open-access article distributed under the terms of the Creative Commons Attribution License, which permits unrestricted use, distribution, and reproduction in any medium, provided the original author and source are credited.

**Funding:** This meta-analysis was supported by a grant (Grant No.: 81374729) from the National Natural Science Foundation of China. The funders had no role in study design, data collection and analysis, decision to publish, or preparation of the manuscript.

**Competing Interests:** The authors have declared that no competing interests exist.

\* E-mail: xudingmd@gmail.com

These authors contributed equally to this work.

## Introduction

Vitamin E is an important chain-breaking antioxidant that prevents free radical reactions and lipid peroxidation [1]. Owing to this antioxidant function, vitamin E may be particularly relevant in relation to the development of several cancers, including prostate cancer [2].  $\alpha$ -Tocopherol is the predominant form of vitamin E in the plasma, regardless of dietary intake, due to preferential binding by the hepatic  $\alpha$ -tocopherol transfer protein [3,4]. This molecule protects cell membranes and DNA from free radical damage that may lead to malignant transformation [1,5]. The major food sources of  $\alpha$ -tocopherol include vegetable oils such as sunflower seed oil, and that of  $\gamma$ -tocopherol are vegetable oils such as soy and maize oil [2,3].  $\gamma$ -Tocopherol, which is the predominant vitamin E isoform consumed in the United States [6], has several anti-carcinogenic properties that are distinct from those of  $\alpha$ -tocopherol. For instance,  $\gamma$ -tocopherol and its primary metabolite 2,7,8-trimethyl-2-( $\gamma$ -carboxyethyl)-6-hydroxychroman, exhibit anti-inflammatory activities via the inhibition of cyclooxygenase-2 activity [4,5]. Many epidemiological studies have evaluated the relationship of blood  $\alpha$ - and  $\gamma$ -

tocopherol levels with the risk of prostate cancer; however, their results were equivocal, modest, or null.

The principal objective of this review was to evaluate the evidence from prospective studies on blood levels of  $\alpha$ - and  $\gamma$ -tocopherols and the risk of prostate cancer, by summarizing it quantitatively with a meta-analysis approach.

## Methods

### Search strategy and eligibility criteria

This meta-analysis was conducted in accordance with PRISMA (Preferred Reporting Items for Systematic Reviews and Meta-Analyses) guidelines [7]. We conducted a literature search of articles published before October 2013 in the PubMed and Embase databases. We used the following search terms without restrictions: “vitamin E”, “tocopherols”, “micronutrients”, and “prostate cancer”. Moreover, we reviewed the reference lists of retrieved articles to identify any studies that were not identified from the preliminary literature searches. Studies were included in the meta-analysis if they met the following criteria: (1) they had a prospective design (cohort or nested case-control studies); (2) the exposure of interest was blood (plasma or

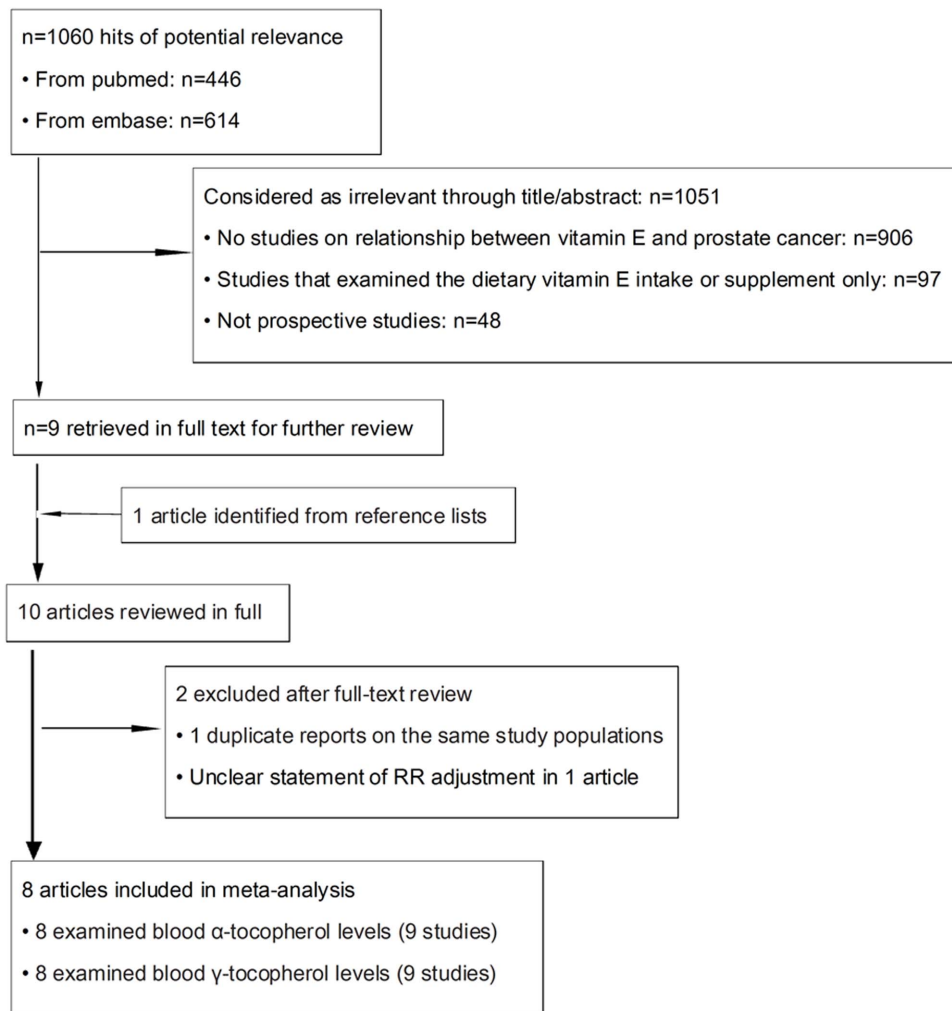

**Figure 1. Literature search and study selection.**

doi:10.1371/journal.pone.0093044.g001

serum) levels of  $\alpha$ - and  $\gamma$ -tocopherols; (3) the outcome of interest was prostate cancer; and (4) adjusted relative risk (RR) estimates with 95% confidence intervals (CIs) were reported. Where data sets overlapped or were duplicated, only the study with the largest number of cases was included.

### Quality assessment

Before data extraction and synthesis, we conducted a critical quality assessment on preliminarily included studies, by using the 9-star Newcastle–Ottawa Scale (NOS)[8]. This scale includes three aspects of evaluation: selection, comparability, and exposure between the case group and control group. Studies that scored  $<5$  stars would be excluded. Two authors (R.C. and Z.Q.L.) independently assessed the quality of nine studies. Any discrepancies in NOS items between the two authors were resolved by consensus.

### Data extraction

Two authors independently extracted and cross-checked the data to reach a consensus. The following variables were recorded: the first author's last name, publication year, country where the study was performed, study period, participant age, sample size (cases and controls or cohort size), measure and range of exposure,

variables adjusted for in the analysis, and RR estimates with corresponding 95% CIs for the highest versus lowest categories of blood  $\alpha$ - and  $\gamma$ -tocopherol. Given the confounding effect of covariates on the meta-analysis, we extracted the RRs that reflected the greatest degree of control for potential confounders for use in the primary analysis.

### Data synthesis and statistical analysis

Study-specific RR estimates were combined using a random-effects model, which considers both within-study and between-study variation[9]. Statistical heterogeneity among studies was evaluated with the  $Q$  and  $I^2$  statistics[10]. Sensitivity analyses evaluated whether the results could have been markedly affected by a single study. Subgroup analyses were performed for geographic area, study quality, and range of exposure. Potential publication bias was evaluated using the Egger regression asymmetry test[11]. For the meta-analysis of the dose–response relationship between blood  $\alpha$ -tocopherol levels and prostate cancer risk, we used the method of generalized least squares for trend estimation, as proposed by Greenland and Longnecker[12]\_ENREF\_11 and Orsini et al.[13]\_ENREF\_12\_ENREF\_12 Using this method, we computed the trend from the correlated natural logarithms of RR estimates across categories of

**Table 1.** Characteristics of prospective studies on blood  $\alpha$ - and  $\gamma$ -tocopherol levels and risk of prostate cancer.

| Source                | Location           | Study period                                             | Study type                | Age, $\gamma$ (mean $\pm$ SD)                                                               | No. of Cases              | No. of matched controls   | No. of participants            | Measure/Range of Exposure (mg/L)                                                                                                                                                                                                 | Adjustment for Covariates                                                                                                                            |
|-----------------------|--------------------|----------------------------------------------------------|---------------------------|---------------------------------------------------------------------------------------------|---------------------------|---------------------------|--------------------------------|----------------------------------------------------------------------------------------------------------------------------------------------------------------------------------------------------------------------------------|------------------------------------------------------------------------------------------------------------------------------------------------------|
| Weinstein et al, 2012 | United States      | 1993–2001                                                | Nested case-control study | 55–74                                                                                       | 680                       | 824                       | 28,243                         | Serum $\alpha$ -tocopherol: $\leq 12.3(Q1), > 24.5(Q5)$ ;<br>Serum $\gamma$ -tocopherol: $\leq 1.38(Q1), > 4.78(Q5)$                                                                                                             | Age, time since initial screening, year of blood draw, study center, serum cholesterol, and serum $\beta$ -carotene.                                 |
| Gill et al, 2009      | United States      | 1993–1996                                                | Nested case-control study | 45–75                                                                                       | 467                       | 936                       | 96,382                         | Serum $\alpha$ -tocopherol: $9.0(Q1), > 25.1(Q4)$ ; Serum $\gamma$ -tocopherol: $0.6(Q1), > 3.4(Q4)$                                                                                                                             | Age, fasting hours prior to blood draw, BMI, family history of prostate cancer, and education level.                                                 |
| Key et al, 2007       | European countries | 1992–2000                                                | Nested case-control study | Cases: $60.4(5.8)$<br>Controls: $60.1(5.7)$                                                 | 966                       | 1,064                     | 137,001                        | Plasma $\alpha$ -tocopherol: $< 11.32(Q1), \geq 16.80(Q5)$ ;<br>Plasma $\gamma$ -tocopherol: $< 0.63(Q1), \geq 1.61(Q5)$                                                                                                         | BMI, smoking status, alcohol intake, physical activity level, marital status, and educational level.                                                 |
| Huang et al, 2002     | United States      | CLUE I cohort (1974–1996);<br>CLUE II cohort (1989–1996) | Nested case-control study | CLUE I: Cases: $54(9)$<br>Controls: $54(9)$<br>CLUE II: Cases: $66(8)$<br>Controls: $66(8)$ | CLUE I 182<br>CLUE II 142 | CLUE I 364<br>CLUE II 284 | CLUE I 9,804<br>CLUE II 10,456 | CLUE I: Serum $\alpha$ -tocopherol: $9.6(Q1), > 15.5(Q5)$ ;<br>Serum $\gamma$ -tocopherol: $1.6(Q1), > 3.5(Q5)$ ; CLUE II: Serum $\alpha$ -tocopherol: $10.4(Q1), > 17.5(Q5)$ ; Serum $\gamma$ -tocopherol: $1.8(Q1), > 4.1(Q5)$ | Age, number of years since blood was drawn, disease stage at diagnosis, smoking status, and BMI.                                                     |
| Goodman et al, 2003   | United States      | 1983–1997                                                | Nested case-control study | 45–74                                                                                       | 205                       | 483                       | 18,314                         | Serum $\alpha$ -tocopherol: $10.67(Q1), > 16.80(Q4)$ ;<br>$\gamma$ -tocopherol: $1.75(Q1), > 3.57(Q4)$                                                                                                                           | Age, study center at randomization, smoking status, and year of randomization.                                                                       |
| Gann et al, 1999      | United States      | 1982–1995                                                | Nested case-control study | 40–84                                                                                       | 578                       | 1,294                     | 22,071                         | Plasma $\alpha$ -tocopherol: $8.56(Q1), > 14.44(Q5)$ ; Plasma $\gamma$ -tocopherol: $1.25(Q1), > 2.53(Q5)$                                                                                                                       | Physical activity, BMI, plasma total cholesterol, alcohol consumption, and multivitamin supplement use.                                              |
| Weinstein et al, 2005 | Finland            | 1985–1988                                                | Nested case-control study | 50–69                                                                                       | 100                       | 200                       | 29,133                         | Serum $\alpha$ -tocopherol: $12.6(T1), > 15.78(T3)$ ; Serum $\gamma$ -tocopherol: $0.76(T1), > 1.08(T3)$                                                                                                                         | Age, BMI, height, smoking status, benign prostatic hyperplasia, physical activity, urban residence, education, marital status, and serum cholesterol |

Table 1. Cont.

| Source       | Location           | Study period | Study type                | Age, $\gamma$ (mean $\pm$ SD)         | No. of Cases | No. of matched controls | No. of participants | Measure/Range of Exposure (mg/L)                                                              | Adjustment for Covariates                                                                                                                                         |
|--------------|--------------------|--------------|---------------------------|---------------------------------------|--------------|-------------------------|---------------------|-----------------------------------------------------------------------------------------------|-------------------------------------------------------------------------------------------------------------------------------------------------------------------|
| Cheng et al. | 2011 United States | 1985–2005    | Nested case-control study | Cases:60.6(5.7)<br>Controls:60.3(5.8) | 684          | 1,441                   | 18,314              | Serum $\alpha$ -tocopherol:11.16(Q1),32.84(Q4); Serum $\gamma$ -tocopherol: 0.99(Q1),9.15(Q4) | Age, race, randomization assignment, family history of prostate cancer in first-degree relatives, alcohol consumption, smoking status, BMI, and serum cholesterol |

Abbreviations: BMI: body mass index, T:tertile, Q:quartile/quintile, SD: standard deviation. \* Derived from the slogan of a campaign, "Give us a CLUE to cancer."  
doi:10.1371/journal.pone.0093044.t001

$\alpha$ -tocopherol levels. For each study, the median level of  $\alpha$ -tocopherol for each category was assigned to each corresponding RR estimate. We examined a potential nonlinear dose–response relationship between  $\alpha$ -tocopherol levels and prostate cancer by modeling  $\alpha$ -tocopherol levels using restricted cubic splines with three knots at percentiles 25%, 50%, and 75% of the distribution[14]. A  $p$  value for nonlinearity was calculated by testing the null hypothesis that the coefficient of the second spline is equal to 0. All statistical tests were performed using Stata 12 (Stata Corp., College Station, Texas). A  $p$  value of  $<0.05$  was considered statistically significant.

## Results

### Literature search

A flow diagram of our literature search is shown in Figure 1. In brief, we identified 10 potentially relevant articles concerning blood  $\alpha$ - and  $\gamma$ -tocopherol levels in relation to the risk of prostate cancer. Two articles[15,16]\_ENREF\_13\_ENREF\_14 were excluded because of unclear statement of RR adjustment and \_ENREF\_14reporting on the same population as in another study[17]\_ENREF\_14. The remaining eight articles, including nine studies (one article[17] reported results from two subcohorts) on blood  $\alpha$ - and  $\gamma$ -tocopherol levels were included in the meta-analysis.

### Study characteristics

All nine studies were nested case–control studies and published between 1999 and 2012 (Table 1); they involved a total of 4,004 cases and 6,890 controls. Seven studies[17–22]\_ENREF\_17were conducted in the United States, and two in Europe[23,24]\_ENREF\_19 Two studies[21,24] measured plasma  $\alpha$ - and  $\gamma$ -tocopherol levels, and seven studies[17–20,22,23] measured serum  $\alpha$ - and  $\gamma$ -tocopherol levels.  $\alpha$ -Tocopherol and  $\gamma$ -tocopherol levels were assayed using high-performance liquid chromatography.

Most studies provided risk estimates that were adjusted for age (seven studies), smoking status (six studies), and body mass index (seven studies); few adjusted for alcohol consumption (three studies), blood cholesterol (three studies), and physical activity (three studies).\_ENREF\_20 All articles but one[23]\_ENREF\_18stated the follow-up duration in the text. The mean NOS score was 7.3 stars (range, 6–8 stars; Table 2). Therefore, the overall quality of all studies was fair.

### High vs. low $\alpha$ - and $\gamma$ -tocopherol levels

Multivariate-adjusted RRs for each study and the highest vs. lowest categories of blood  $\alpha$ - and  $\gamma$ -tocopherol levels in all studies are shown in Figure 2. The pooled RRs of prostate cancer for the highest vs. lowest categories of  $\alpha$ -tocopherol and  $\gamma$ -tocopherol levels were 0.79 (95% CI: 0.68–0.91) and 0.89 (95% CI: 0.71–1.12), respectively. There was statistically significant heterogeneity among the studies in the case of  $\gamma$ -tocopherol levels ( $I^2$ : 61.0%,  $p$  = 0.008) but not in the case of  $\alpha$ -tocopherol levels ( $I^2$ : 12.4%,  $p$  = 0.33). The Egger test showed no evidence of publication bias for  $\alpha$ -tocopherol levels ( $p$  = 0.08) or  $\gamma$ -tocopherol levels ( $p$  = 0.08).

### Sensitivity and stratifying analyses

A sensitivity analysis was conducted to explore the heterogeneity among the studies in the case of  $\gamma$ -tocopherol levels and prostate cancer risk. When we omitted the studies one by one and repeated the meta-analysis, the results were not substantially changed. However, exclusion of CLUE II, the study by Huang et al. [17]\_ENREF\_15 yielded a pooled RR of 0.97 (95% CI: 0.8–1.15), with no heterogeneity among the remaining studies ( $I^2$ :

**Table 2.** Methodological quality assessment based on the NOS.<sup>a</sup>

| Source                    | Selection               |                                 |                        |                         | Comparability <sup>f</sup> | Exposure                   |                     |                   |                    |
|---------------------------|-------------------------|---------------------------------|------------------------|-------------------------|----------------------------|----------------------------|---------------------|-------------------|--------------------|
|                           | Definition <sup>b</sup> | Representativeness <sup>c</sup> | Selection <sup>d</sup> | Definition <sup>e</sup> |                            | Ascertainment <sup>g</sup> | Method <sup>h</sup> | Rate <sup>i</sup> | Total <sup>j</sup> |
| Weinstein et al, 2012     | 1                       | 1                               | 1                      | 1                       | 1                          | 1                          | 1                   | 0                 | 7                  |
| Gill et al, 2009          | 1                       | 1                               | 1                      | 1                       | 2                          | 1                          | 1                   | 0                 | 8                  |
| Key et al, 2007           | 1                       | 1                               | 1                      | 1                       | 2                          | 1                          | 1                   | 0                 | 8                  |
| Huang et al, CLUE I 2002  | 1                       | 1                               | 1                      | 1                       | 2                          | 1                          | 1                   | 0                 | 8                  |
| Huang et al, CLUE II 2002 | 1                       | 1                               | 1                      | 1                       | 2                          | 1                          | 1                   | 0                 | 8                  |
| Goodman et al, 2003       | 1                       | 1                               | 1                      | 1                       | 1                          | 1                          | 1                   | 0                 | 7                  |
| Gann et al, 1999          | 1                       | 1                               | 1                      | 0                       | 1                          | 1                          | 1                   | 0                 | 6                  |
| Weinstein et al, 2005     | 1                       | 1                               | 1                      | 0                       | 1                          | 1                          | 1                   | 0                 | 6                  |
| Cheng et al, 2011         | 1                       | 1                               | 1                      | 1                       | 2                          | 1                          | 1                   | 0                 | 8                  |

<sup>a</sup>Assessed with the 9-star Newcastle-Ottawa Scale(NOS).

<sup>b</sup>Adequate definition of cases(0,1star).

<sup>c</sup>Consecutive or obviously representative series of cases (0,1).

<sup>d</sup>Selection of controls: Community controls (0,1).

<sup>e</sup>Definition of controls: No history of disease (endpoint) (0,1).

<sup>f</sup>Study controls for the most important factor or any additional factor(0,1,2).

<sup>g</sup>Secure record (eg surgical records) (0,1).

<sup>h</sup>Same method of ascertainment for cases and controls(0,1).

<sup>i</sup>Same non-response rate for both groups(0,1).

<sup>j</sup>Total: minimum equals 1; maximum equals 9 stars.

doi:10.1371/journal.pone.0093044.t002

35.4%,  $p=0.15$ ). This study[17] was the only one that showed a statistically significant inverse association between  $\gamma$ -tocopherol levels and prostate cancer and appeared to explain the heterogeneity among the studies.

Upon stratification by geographic region, we found that the pooled RRs of blood  $\alpha$ -tocopherol levels in relation to the risk of prostate cancer were 0.80 (95% CI: 0.67–0.95) for studies conducted in the United States and 0.71 (95% CI: 0.45–1.12) for studies conducted in Europe. There was no statistically significant heterogeneity among the studies in the case of  $\alpha$ -tocopherol levels (United States,  $I^2$ : 18.1% and  $p=0.29$ ; Europe,  $I^2$ : 40.5% and  $p=0.20$ ). Stratification by the range of exposure showed no statistical difference between the narrow ( $\leq 12$  mg/L difference in median intake between the highest and lowest categories) and wide ( $> 12$  mg/L difference) ranges of exposure; the RRs of blood  $\alpha$ -tocopherol levels and prostate cancer for these ranges were 0.77 (95% CI: 0.62–0.97) and 0.79 (95% CI: 0.64–0.98), respectively. No statistical heterogeneity was observed among the studies in the case of  $\alpha$ -tocopherol levels for the two ranges ( $\leq 12$  mg/L difference,  $I^2$ : 25.9% and  $p=0.24$ ;  $> 12$  mg/L difference,  $I^2$ : 16.0% and  $p=0.30$ ). No statistical difference was found when we stratified the studies by methodological quality. The RR of  $\alpha$ -tocopherol levels in relation to prostate cancer in studies that met higher quality criteria (8 stars) was 0.82 (95% CI: 0.69–0.97), and that of studies that met lower quality criteria (6–7 stars) was 0.71 (95% CI: 0.50–1.01).

### Dose–response meta-analysis

We next assessed the dose–response relationship between blood  $\alpha$ -tocopherol levels and the risk of prostate cancer, using all available data points from each study. The test for a nonlinear

dose–response relationship yielded significant results ( $p<0.05$ ). However, we detected a slight curvature in the relationship curve (Figure 3). Furthermore, we found that the between-study standard deviation was very close to zero ( $\sqrt{\tau^2} = \sqrt{0.0000078} = 0.003$ ), suggesting that the study-specific trends had only a small spread around the average trend (coefficient =  $-0.0095$ ) for the nine studies. In addition, the goodness-of-fit test ( $\chi^2 = 8.81$ ,  $p=0.36$ ) implied no further problems with the fitted model. A 25-mg/L increment in blood  $\alpha$ -tocopherol conferred an RR of 0.79 (95% CI: 0.68–0.91,  $p=0.002$ ).

### Discussion

Our results from the meta-analysis of nested case–control studies suggest that increased blood  $\alpha$ -tocopherol levels, rather than  $\gamma$ -tocopherol levels, are inversely associated with the risk of prostate cancer. Overall, the risk of prostate cancer decreased by 21% for every 25-mg/L increase in blood  $\alpha$ -tocopherol level.

In the Alpha-Tocopherol, Beta-Carotene Cancer Prevention (ATBC) study, Heinonen et al.[25] investigated the effect of  $\alpha$ -tocopherol and  $\beta$ -carotene supplementation, separately or together, on the risk of prostate cancer in male smokers. They found that long-term supplementation with  $\alpha$ -tocopherol substantially reduced prostate cancer incidence by 32% (95% CI: 12%–47%) and mortality by 41% (95% CI: 1%–65%). Similarly, observational data also suggested a vitamin E–prostate cancer–smoking interaction, with a beneficial association for vitamin E supplementation and high tocopherol levels in smokers for aggressive, but not non-aggressive, disease[22,26]. In our study, we took the smoking status into consideration; we omitted three studies[18,20,21] that did not adjust the RR for smoking and repeated the meta-analysis

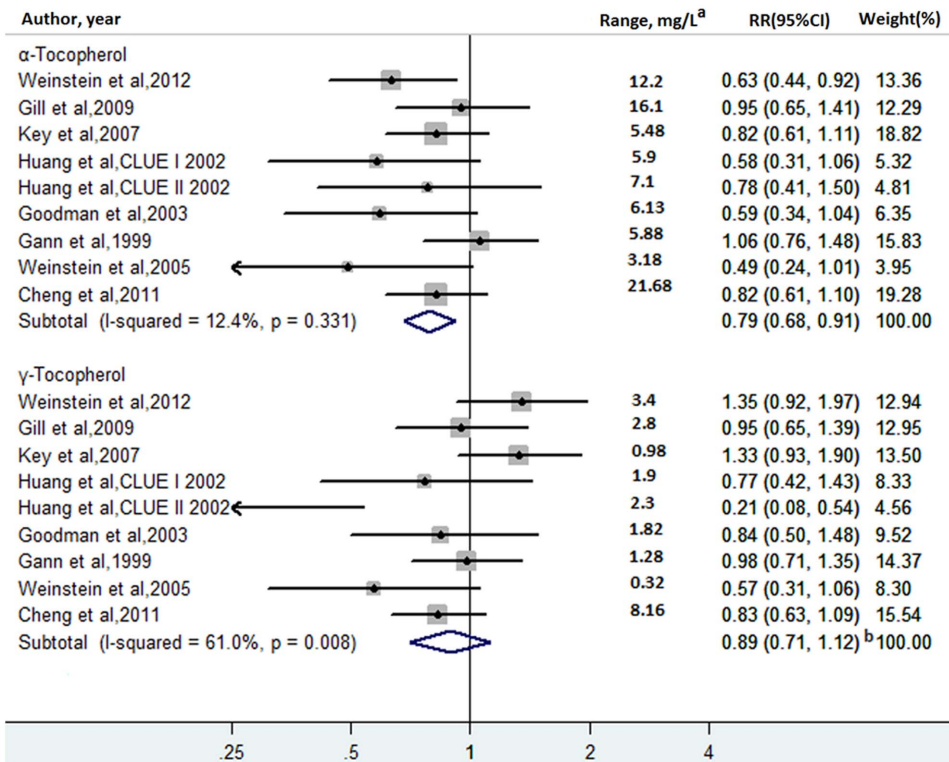

<sup>a</sup>The range is the difference in the midpoint between the highest and lowest categories of exposure.  
<sup>b</sup>Exclusion of CLUE II, the study conducted by Huang et al.<sup>17</sup>, which appeared to explain the heterogeneity, yielded a pooled relative risk of 0.97(95%CI,0.8-1.15) with no heterogeneity among the remaining studies(I<sup>2</sup>=35.4%, p=0.146).

**Figure 2. Adjusted relative risks of prostate cancer for the highest vs. lowest categories of blood  $\alpha$ - and  $\gamma$ -tocopherol levels.**  
 doi:10.1371/journal.pone.0093044.g002

of  $\alpha$ -tocopherol in relation to prostate cancer risk. However, the results did not change appreciably (RR: 0.75, 95% CI: 0.63–0.85), and no heterogeneity was observed (I<sup>2</sup>: 0%, p = 0.63).

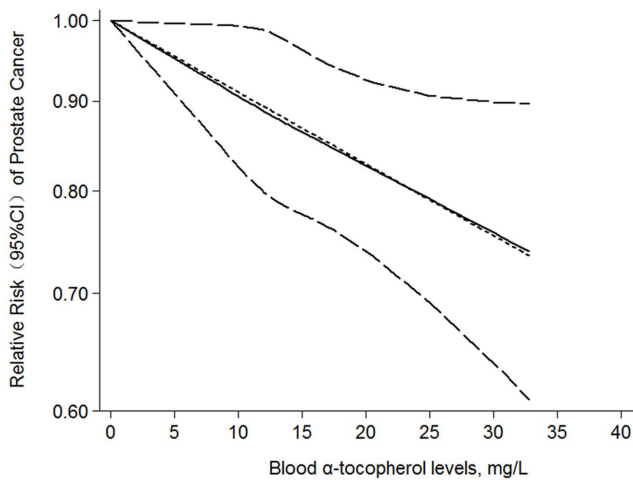

**Figure 3. Dose-response relationship between blood  $\alpha$ -tocopherol levels and relative risk of prostate cancer.** Blood  $\alpha$ -tocopherol levels were modeled with a linear trend in a random-effects meta-regression model. The solid line represents point estimates of association between blood  $\alpha$ -tocopherol levels and prostate cancer risk; dashed lines are 95% confidence intervals (CIs).  
 doi:10.1371/journal.pone.0093044.g003

The nested case-control design potentially offered impressive reductions in costs and efforts of data collection and analysis compared with the full cohort approach, with relatively minor loss in statistical efficiency[27]. A strength of this study is that our quantitative assessment was based on biological samples collected at the baseline prior to disease development, which was considered more objective and would better minimize recall bias and miscalculation compared with cohort studies[26,28] using self-reported food frequency questionnaires to obtain information about the doses of dietary vitamin E or supplements. Recall bias and miscalculation might exaggerate or underestimate the risk estimates in these cohort studies.

Our study also has several limitations. First, the current meta-analysis is unable to solve problems with confounding factors that could be inherent in the included studies. Although most studies adjusted for other possible risk factors for prostate cancer, residual or unknown confounding cannot be excluded as a potential explanation for the observed findings. A second limitation is that our results are likely to be affected by the wide range of values for the cutoff points for the lowest and highest categories for  $\alpha$ - and  $\gamma$ -tocopherol levels in several studies, which might also impact the current analysis. Third, heterogeneity may be introduced because of methodological differences among studies, including different ranges of exposure and inadequate or unreported follow-up duration or failure to follow up cases. Finally, potential publication bias could be of concern because small studies with null results tended not to be published, especially in the case of clinical trials. In our meta-analysis, we found no evidence of publication bias. However, we will update our study when possible.

Although blood  $\alpha$ -tocopherol levels were associated with reduced prostate cancer risk in one prospective study[18] and although this association has also been proved in this meta-analysis, the results from one population-based prospective study raised the possibility that only serum  $\gamma$ -tocopherol was associated with prostate cancer risk[17]. This is because the high dose of vitamin E supplement intake or high plasma  $\alpha$ -tocopherol levels could reduce plasma  $\gamma$ -tocopherol concentration[18,29]. In other words, the potential role of  $\gamma$ -tocopherol in reducing the risk of prostate cancer might be masked or weakened by  $\alpha$ -tocopherol. Despite the higher dietary intake of  $\gamma$ -tocopherol, circulating concentrations of  $\alpha$ -tocopherol are far higher than those of  $\gamma$ -tocopherol[30]. In fact, in our meta-analysis, among the nine studies on the association of blood  $\gamma$ -tocopherol concentrations with prostate cancer risk, seven showed an inverse association, which was statistically significant in one study[17], though no beneficial effect was found.  $\gamma$ -Tocopherol may contribute significantly to human health in ways that have not yet been recognized, it is our opinion that this possibility should be considered and carefully evaluated. With present evidence, we suggest that people,

especially the aged, should intake sufficient vegetables and fruits that are enriched in Vitamin E such as lettuce and kiwi fruit in daily life. We do not recommend the healthy population to intake excess vitamin E pills or its elemental diets. Given the interactions between  $\alpha$ - and  $\gamma$ -tocopherols, further study is warranted.

## Supporting Information

### Checklist S1

(PDF)

## Acknowledgments

We would like to acknowledge Dr. Li-ling Zou, Tongji University, for assistance with the statistical software.

## Author Contributions

Performed the experiments: RC Z-Q, QL QX. Analyzed the data: RC Z-Q, QL QX. Contributed reagents/materials/analysis tools: RC Z-Q, QL QX. Wrote the paper: RC Z-Q, QL QX.

## References

- Meydani M (1995) Vitamin E. *Lancet* 345: 170–175.
- Khandrika L, Kumar B, Koul S, Maroni P, Koul HK (2009) Oxidative stress in prostate cancer. *Cancer Lett* 282: 125–136.
- Brigelius-Flohe R, Kelly FJ, Salonen JT, Neuzil J, Zingg JM, et al. (2002) The European perspective on vitamin E: current knowledge and future research. *Am J Clin Nutr* 76: 703–716.
- Traber MG, Arai H (1999) Molecular mechanisms of vitamin E transport. *Annu Rev Nutr* 19: 343–355.
- Packer L (1991) Protective role of vitamin E in biological systems. *Am J Clin Nutr* 53: 1050S–1055S.
- Jiang Q, Christen S, Shigenaga MK, Ames BN (2001) gamma-tocopherol, the major form of vitamin E in the US diet, deserves more attention. *Am J Clin Nutr* 74: 714–722.
- Moher D, Liberati A, Tetzlaff J, Altman DG (2009) Preferred reporting items for systematic reviews and meta-analyses: the PRISMA statement. *BMJ* 339: b2535.
- Stang A (2010) Critical evaluation of the Newcastle-Ottawa scale for the assessment of the quality of nonrandomized studies in meta-analyses. *Eur J Epidemiol* 25: 603–605.
- DerSimonian R, Laird N (1986) Meta-analysis in clinical trials. *Control Clin Trials* 7: 177–188.
- Higgins JP, Thompson SG (2002) Quantifying heterogeneity in a meta-analysis. *Stat Med* 21: 1539–1558.
- Egger M, Davey Smith G, Schneider M, Minder C (1997) Bias in meta-analysis detected by a simple, graphical test. *BMJ* 315: 629–634.
- Greenland S, Longnecker MP (1992) Methods for trend estimation from summarized dose-response data, with applications to meta-analysis. *Am J Epidemiol* 135: 1301–1309.
- Orsini N, Bellocco R, Greenland S (2006) Generalized least squares for trend estimation of summarized dose-response data. *Stata Journal* 6: 40–57.
- Harrell FE, Jr, Lee KL, Pollock BG (1988) Regression models in clinical studies: determining relationships between predictors and response. *J Natl Cancer Inst* 80: 1198–1202.
- Nomura AM, Stemmermann GN, Lee J, Craft NE (1997) Serum micronutrients and prostate cancer in Japanese Americans in Hawaii. *Cancer Epidemiol Biomarkers Prev* 6: 487–491.
- Hsing AW, Comstock GW, Abbey H, Polk BF (1990) Serologic precursors of cancer. Retinol, carotenoids, and tocopherol and risk of prostate cancer. *J Natl Cancer Inst* 82: 941–946.
- Huang HY, Alberg AJ, Norkus EP, Hoffman SC, Comstock GW, et al. (2003) Prospective study of antioxidant micronutrients in the blood and the risk of developing prostate cancer. *Am J Epidemiol* 157: 335–344.
- Weinstein SJ, Peters U, Ahn J, Friesen MD, Riboli E, et al. (2012) Serum alpha-tocopherol and gamma-tocopherol concentrations and prostate cancer risk in the PLCO Screening Trial: a nested case-control study. *PLoS One* 7: e40204.
- Goodman GE, Schaffer S, Omenn GS, Chen C, King I (2003) The association between lung and prostate cancer risk, and serum micronutrients: results and lessons learned from beta-carotene and retinol efficacy trial. *Cancer Epidemiol Biomarkers Prev* 12: 518–526.
- Gill JK, Franke AA, Steven Morris J, Cooney RV, Wilkens LR, et al. (2009) Association of selenium, tocopherols, carotenoids, retinol, and 15-isoprostane F(2t) in serum or urine with prostate cancer risk: the multiethnic cohort. *Cancer Causes Control* 20: 1161–1171.
- Gann PH, Ma J, Giovannucci E, Willett W, Sacks FM, et al. (1999) Lower prostate cancer risk in men with elevated plasma lycopene levels: results of a prospective analysis. *Cancer Res* 59: 1225–1230.
- Cheng TY, Barnett MJ, Kristal AR, Ambrosone CB, King IB, et al. (2011) Genetic variation in myeloperoxidase modifies the association of serum alpha-tocopherol with aggressive prostate cancer among current smokers. *J Nutr* 141: 1731–1737.
- Weinstein SJ, Wright ME, Pietinen P, King I, Tan C, et al. (2005) Serum alpha-tocopherol and gamma-tocopherol in relation to prostate cancer risk in a prospective study. *J Natl Cancer Inst* 97: 396–399.
- Key TJ, Appleby PN, Allen NE, Travis RC, Roddam AW, et al. (2007) Plasma carotenoids, retinol, and tocopherols and the risk of prostate cancer in the European Prospective Investigation into Cancer and Nutrition study. *Am J Clin Nutr* 86: 672–681.
- Heinonen OP, Albanes D, Virtamo J, Taylor PR, Huttunen JK, et al. (1998) Prostate cancer and supplementation with alpha-tocopherol and beta-carotene: incidence and mortality in a controlled trial. *J Natl Cancer Inst* 90: 440–446.
- Chan JM, Stampfer MJ, Ma J, Rimm EB, Willett WC, et al. (1999) Supplemental vitamin E intake and prostate cancer risk in a large cohort of men in the United States. *Cancer Epidemiol Biomarkers Prev* 8: 893–899.
- Ernst VL (1994) Nested Case-Control Studies. *Prev Med* 23: 587–590.
- Rodríguez C, Jacobs EJ, Mondul AM, Calle EE, McCullough ML, et al. (2004) Vitamin E supplements and risk of prostate cancer in U.S. men. *Cancer Epidemiol Biomarkers Prev* 13: 378–382.
- Chopra RK, Bhagavan HN (1999) Relative bioavailabilities of natural and synthetic vitamin E formulations containing mixed tocopherols in human subjects. *Int J Vitam Nutr Res* 69: 92–95.
- Ford ES, Schleiher RL, Mokdad AH, Ajani UA, Liu S (2006) Distribution of serum concentrations of alpha-tocopherol and gamma-tocopherol in the US population. *Am J Clin Nutr* 84: 375–383.
